# Supplementary material
Source: PubMed Central journal article supplement (PMC4516053)

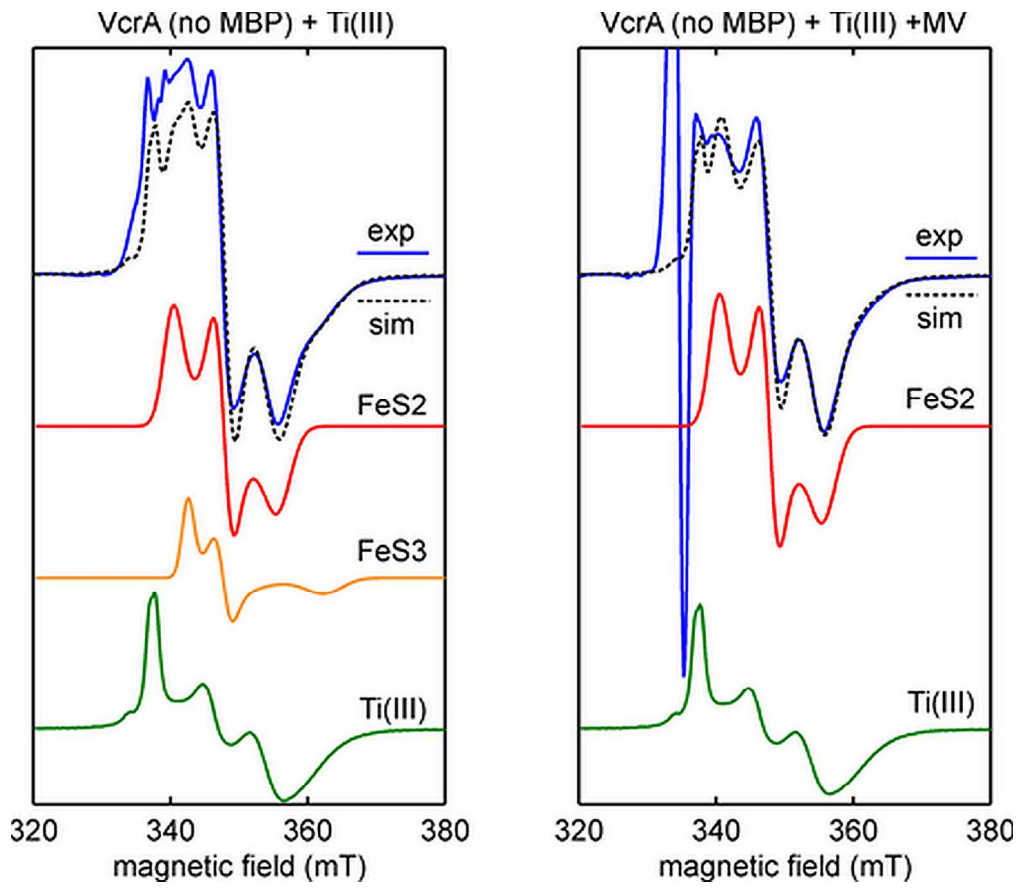

99x86mm (600 x 600 DPI)

Supplement: NIHMS708607-supplement-3.pdf [file NIHMS708607-supplement-3.pdf]
